# Supplementary material
Source: PubMed Central journal article supplement (PMC1474807)
Supplement: mbc_E05-11-1094_1.pdf [file mbc_E05-11-1094_1.pdf]

Du et al. (Akt, SREBP and ER-to-Golgi Transport)

TABLE: Primer Sequences for Gene Expression Analysis

| Gene                                  | Accession  | Direction | Primer Sequence              | Size  |
|---------------------------------------|------------|-----------|------------------------------|-------|
| <i>FAS</i> <sup>#</sup>               | AF356086.1 | Forward   | 5' AGTTACATCATCACTGGTGG 3'   | 179bp |
|                                       |            | Reverse   | 5' TTGCTTGTTGACACTAGCAC 3'   |       |
| <i>HMG-CoA Reductase</i> <sup>#</sup> | X00494.1   | Forward   | 5' CTGGTGATGGGAGCTTGCTGTG 3' | 244bp |
|                                       |            | Reverse   | 5' AATCACAAGCACGAGGAAGACG 3' |       |
| <i>LDL Receptor</i> <sup>#</sup>      | M94387.1   | Forward   | 5' AAGGAGAAGGACACTGTTCC 3'   | 246bp |
|                                       |            | Reverse   | 5' ATGCTGGAGATAGAGTGGAG 3'   |       |
| <i>PBGD</i> <sup>*</sup>              | NM_013551  | Forward   | 5' AGATTCTTGATACTGCACTC 3'   | 192bp |
|                                       |            | Reverse   | 5' TGAAAGACAACAGCATCACA 3'   |       |

<sup>#</sup>Hamster (*Cricetulus griseus*), <sup>\*</sup>Mouse (*Mus musculus*)
